# Supplementary material for: Inhibition of DOT1L by Half-Selenopsammaplin A Analogs Suppresses Tumor Growth and EMT-Mediated Metastasis in Triple-Negative Breast Cancer
Source: MDPI journal article supplement (doi:10.3390/ph14010018), 2020-12-28
Supplement: s1 [file s1]

Article

# **Inhibition of DOT1L by Half-Selenopsammaplin A Analogs Suppresses Tumor Growth and EMT-Mediated Metastasis in Triple-Negative Breast Cancer**

**Woong Sub Byun <sup>1</sup>, Gyu Ho Lee <sup>2</sup>, Hyeung-geun Park <sup>2,\*</sup> and Sang Kook Lee <sup>1,\*</sup>**

<sup>1</sup> College of Pharmacy, Natural Products Research Institute, Seoul National University, Seoul 08826, Republic of Korea; sky\_magic@naver.com (W.S.B.)

<sup>2</sup> College of Pharmacy, Research Institute of Pharmaceutical Sciences, Seoul National University, Seoul 08826, Republic of Korea; boomboombibi@snu.ac.kr (G.H.L.)

\* Correspondence: hgpk@snu.ac.kr (H.-G.P.); sklee61@snu.ac.kr (S.K.L.)

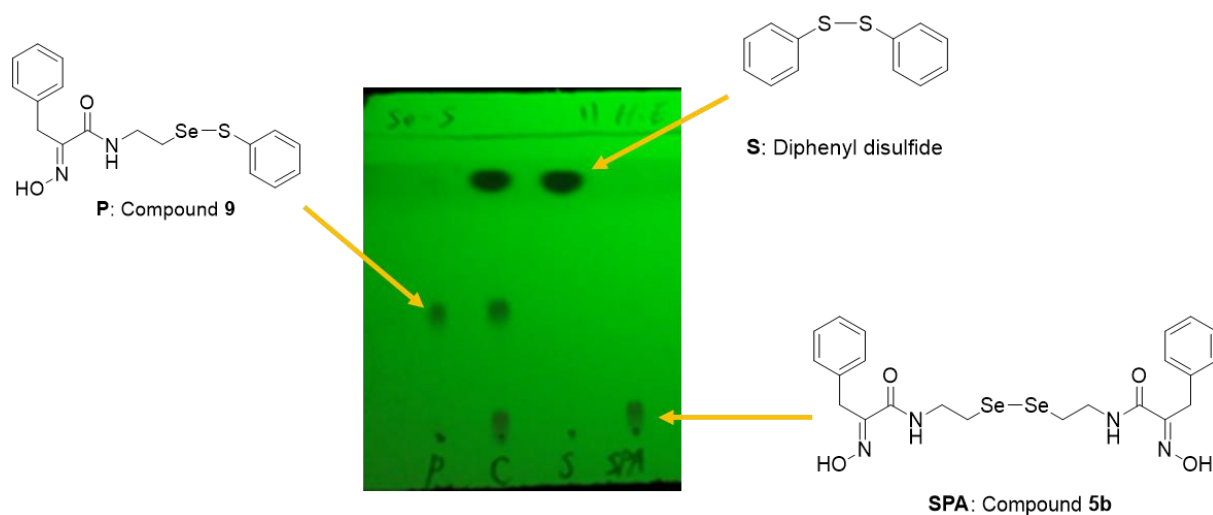

**Figure S1. Thin layer chromatography analysis**

Se-S bond analog (Figure 2, compound **9**) was dissolved in dichloromethane at room temperature. After 48 h, thin layer chromatography (TLC) analysis of the compound **9** was performed. (**P** : Compound **9**, **C** : Co-spot, **S** : Diphenyl disulfide, **SPA** : Compound **5b**, eluent: [Hexane:EtOAc = 1:1]).
